# Supplementary material for: Targeting angiogenesis for radioimmunotherapy with a 177Lu-labeled antibody
Source: Springer Nature journal article supplement (doi:10.1007/s00259-017-3793-2), 2017-08-18
Supplement: MOESM1 [file 14224782]

**Targeting angiogenesis for radioimmunotherapy with a 177Lu-labeled antibody**

Emily B. Ehlerding1, Saige Lacognata2, Dawei Jiang2, Carolina A. Ferreira3, Shreya Goel4, Reinier Hernandez1, Justin J. Jeffery5, Charles P. Theuer6, Weibo Cai1,2,3,4

1University of Wisconsin – Madison, Department of Medical Physics, Madison, WI, USA

2University of Wisconsin – Madison, Department of Radiology, Madison, WI, USA

3University of Wisconsin – Madison, Department of Biomedical Engineering, Madison, WI, USA

4University of Wisconsin – Madison, Department of Materials Science and Engineering, Madison, WI, USA

5University of Wisconsin – Madison Small Animal Imaging Facility, Madison, WI, USA

6 TRACON Pharmaceuticals, Inc., San Diego, CA, USA





Figure S1. Analysis of blood markers, comparing untreated 4T1 tumor-bearing mice and 4T1 tumor-bearing mice at 1 month post-injection of 300 µCi of 177Lu-DTPA-TRC105. WBC: white blood cell count; LYM%: lymphocyte percentage; MON%: monocyte percentage; NEU: neutrophil percentage; ALT: alanine aminotransferase; RBC: red blood cell count; PLT: platelet count.


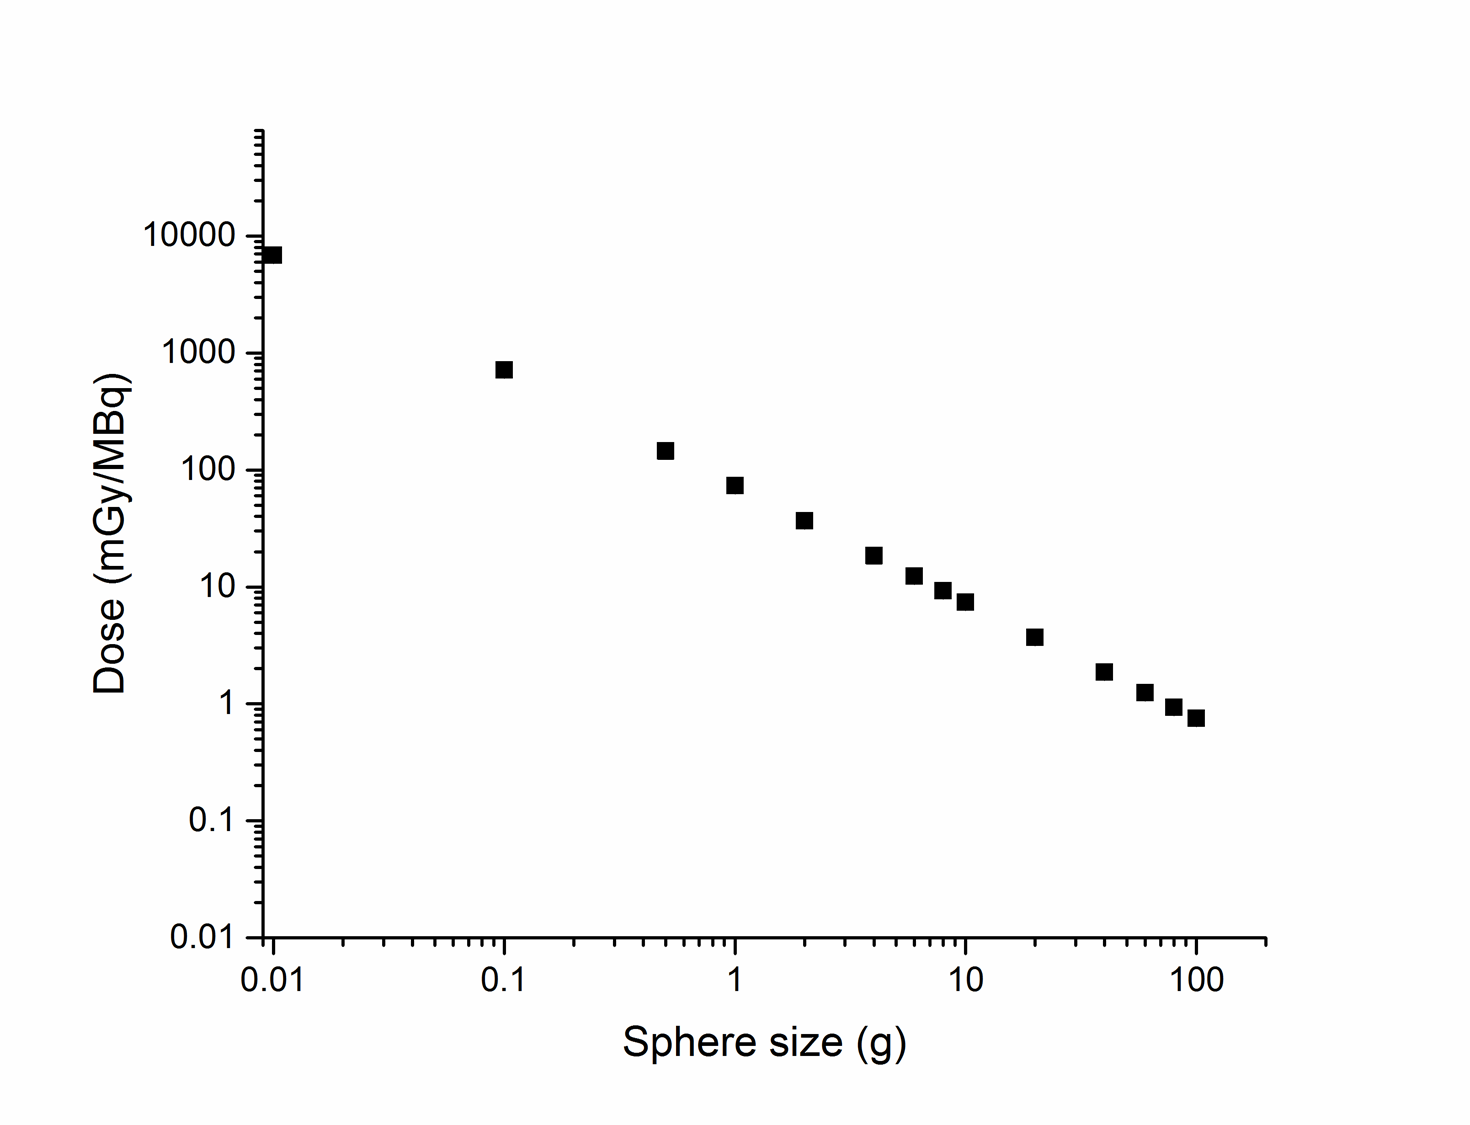


Figure S2. Doses to spheres of given mass, extrapolated from biodistribution data of previous studies [1, 2] and the current study using dose-to-sphere capabilities of OLINDA/EXM. Data is presented as mean ± S.D.; however, scale bars are encompassed within the square markers.


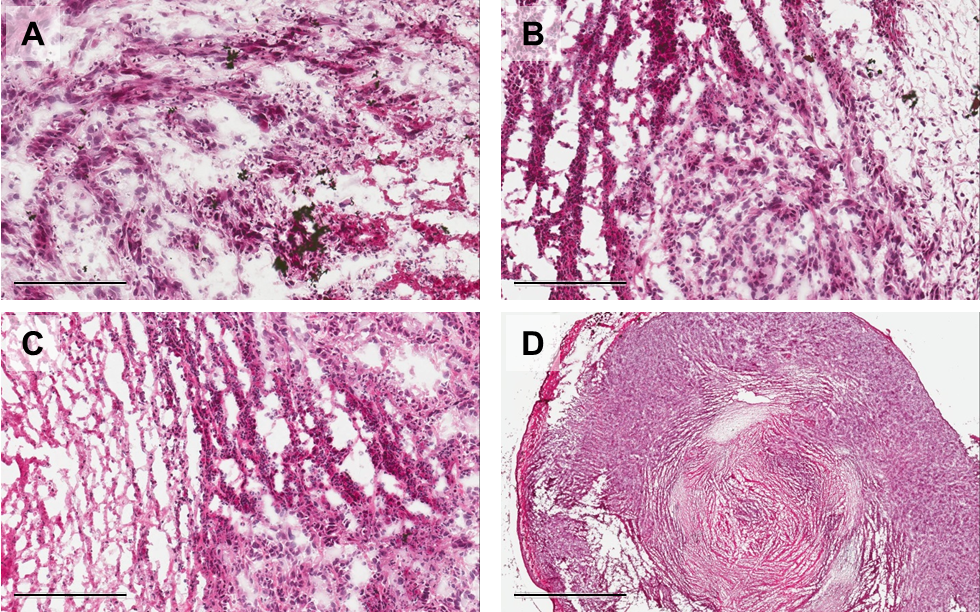


Figure S3. Hematoxylin and eosin staining of tumor tissues at various timepoints post-injection of 177Lu-DTPA-TRC105. (A) 1 day post-injection; (B) 7 days post-injection; (C) one month post-injection at 20x; (D) one month post-injection at 2x magnification. Scale bar (A-C): 200 µm; scale bar (D): 2 mm.

**References**

1. Hong H, Severin GW, Yang Y, Engle JW, Zhang Y, Barnhart TE, Liu G, Leigh BR, Nickles RJ, Cai W: **Positron emission tomography imaging of CD105 expression with 89Zr-Df-TRC105.** *European Journal of Nuclear Medicine and Molecular Imaging* 2012, **39:**138-148.

2. Hong H, Yang Y, Zhang Y, Engle JW, Barnhart TE, Nickles RJ, Leigh BR, Cai W: **Positron emission tomography imaging of CD105 expression during tumor angiogenesis.** *Eur J Nucl Med Mol Imaging* 2011, **38:**1335-1343.
